# Supplementary material for: Development of novel microsphere structured – calcium tungstate as efficacious electrocatalyst for the detection of antibiotic drug nitrofurantoin
Source: Royal Society of Chemistry journal article supplement (doi:10.1039/d3tb02087h), 2023-01-01
Supplement: d3tb02087h1.pdf [file d3tb02087h1.pdf]

**Development of Novel Microsphere Structured - Calcium Tungstate as  
Efficacious Electrocatalyst for the Detection of Antibiotic Drug Nitrofurantoin**

*P.Manikanta.<sup>1</sup>, Mounesh<sup>1</sup>, Rohit Rangnath Nikam<sup>1</sup>, S. Sandeep<sup>2</sup>, Bhari Mallanna Nagaraja<sup>1\*</sup>*

<sup>1</sup>Centre for Nano and Material Sciences, Jain (Deemed-to-be University), Jain Global Campus,  
Kanakapura, Bangalore, Karnataka, India – 562112

<sup>2</sup>Department of Chemistry, S J College of Engineering, JSS Science and Technology University,  
Mysuru-570008, India

*\*Corresponding author*

*Email: [bm.nagaraja@jainuniversity.ac.in](mailto:bm.nagaraja@jainuniversity.ac.in)*

**Supplementary data**

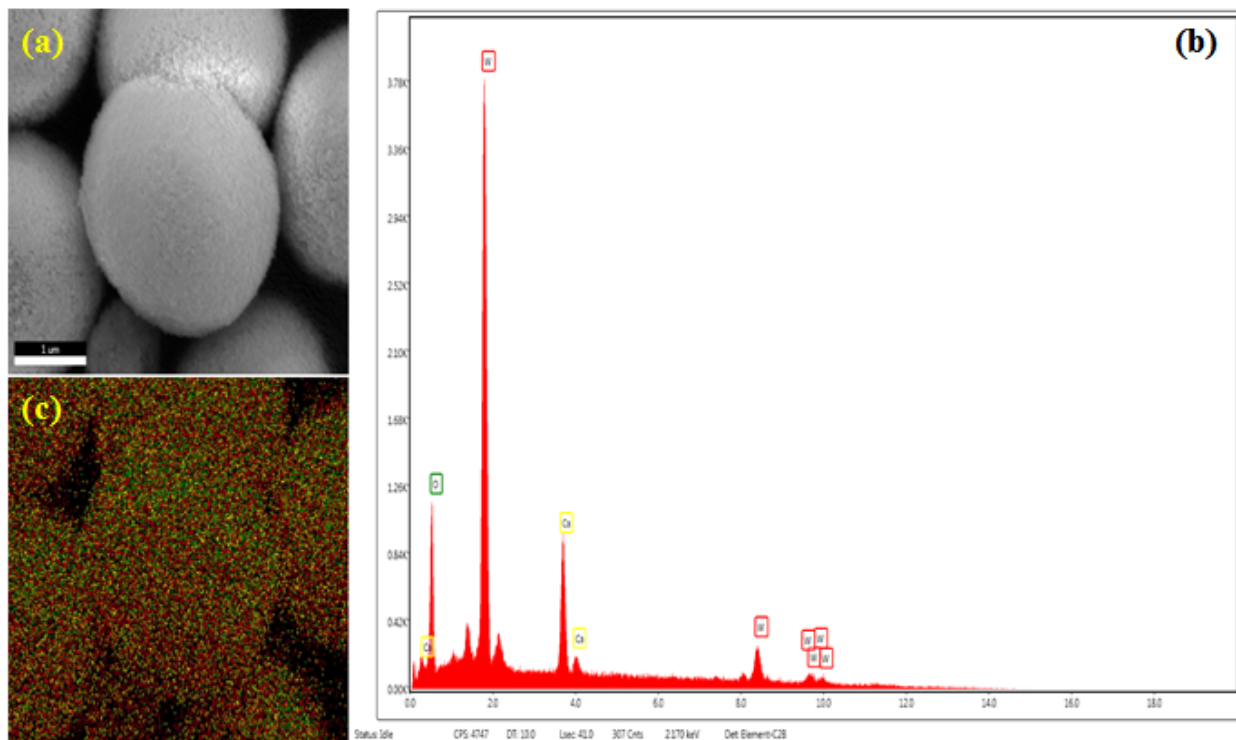

**Figure S1.** EDX spectrum of calcium tungstate microspheres.

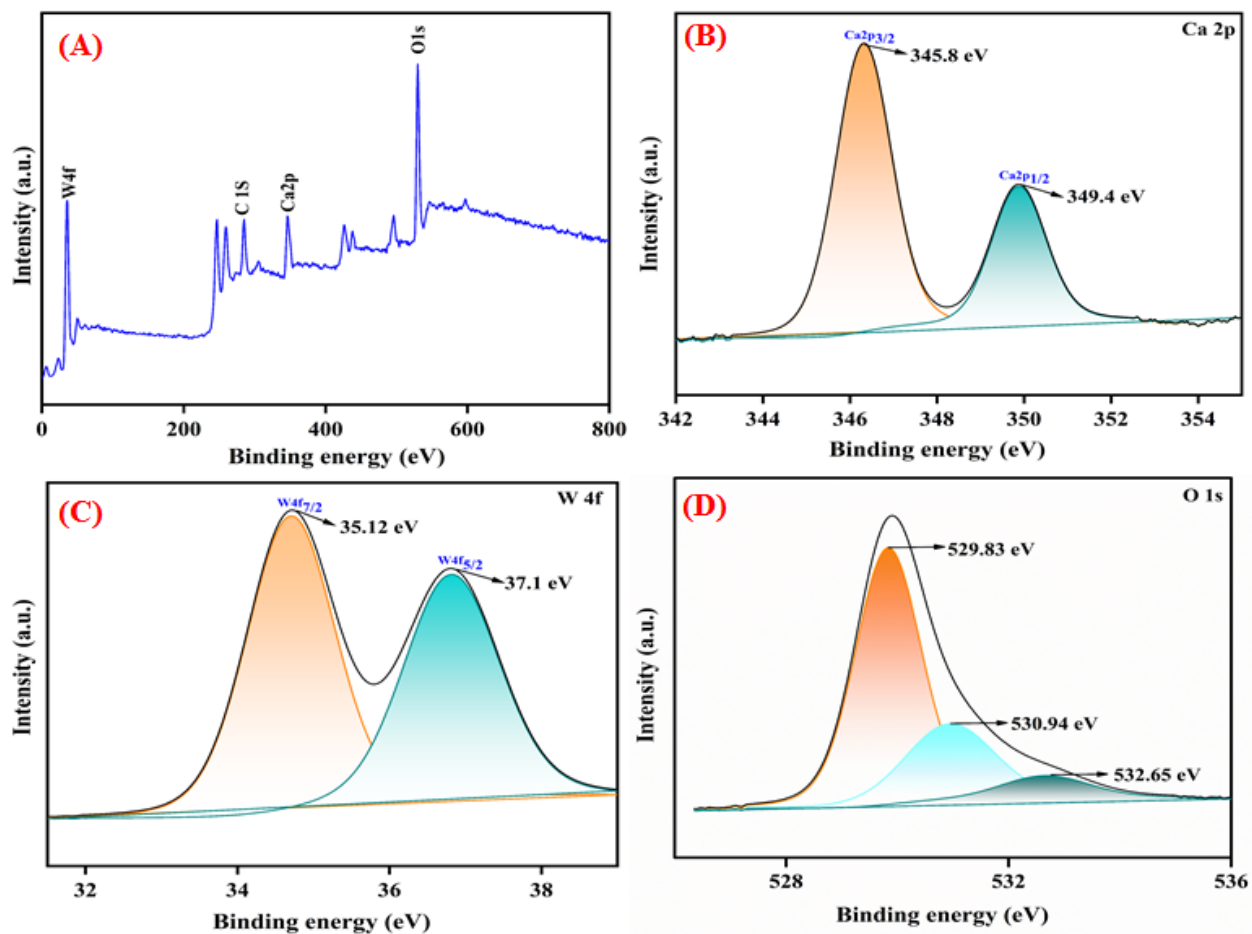

**Figure S2.** (A) The XPS survey spectrum of the calcium tungstate microspheres. High resolution deconvulated spectra of (B) Ca, (C) W and (D) O.

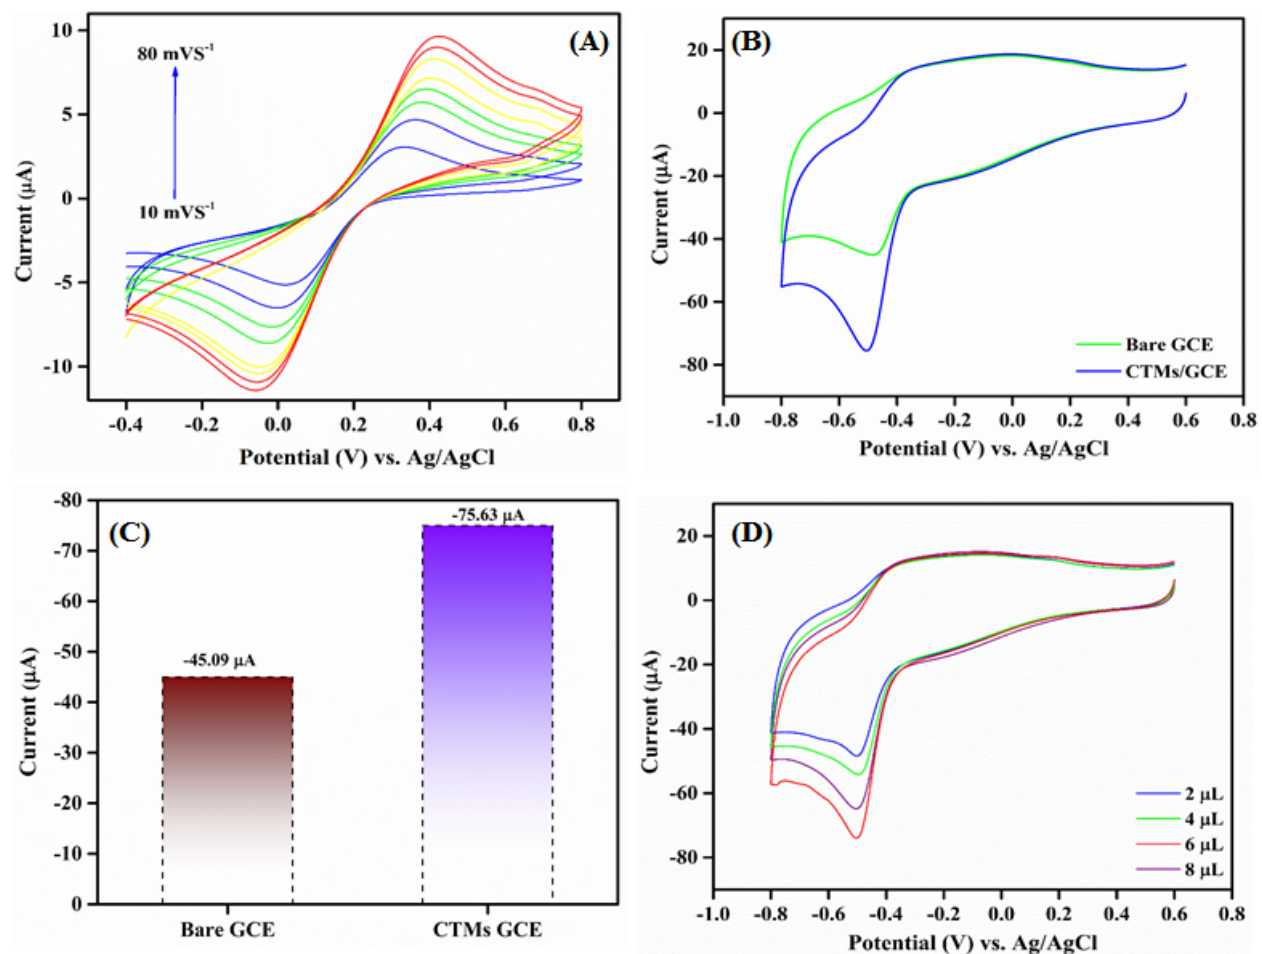

**Figure S3.** (A) CV response of bare GCE in ferric system with increasing scan rate (10 – 80 mV S<sup>-1</sup>). (B) Comparison CV plot of bare and CTMs/GCE with 200 μM NFT in 0.05 M PBS. (C) Corresponding bar graph. (D) CV current response for different electrocatalyst loaded electrodes (2 -8 μL).

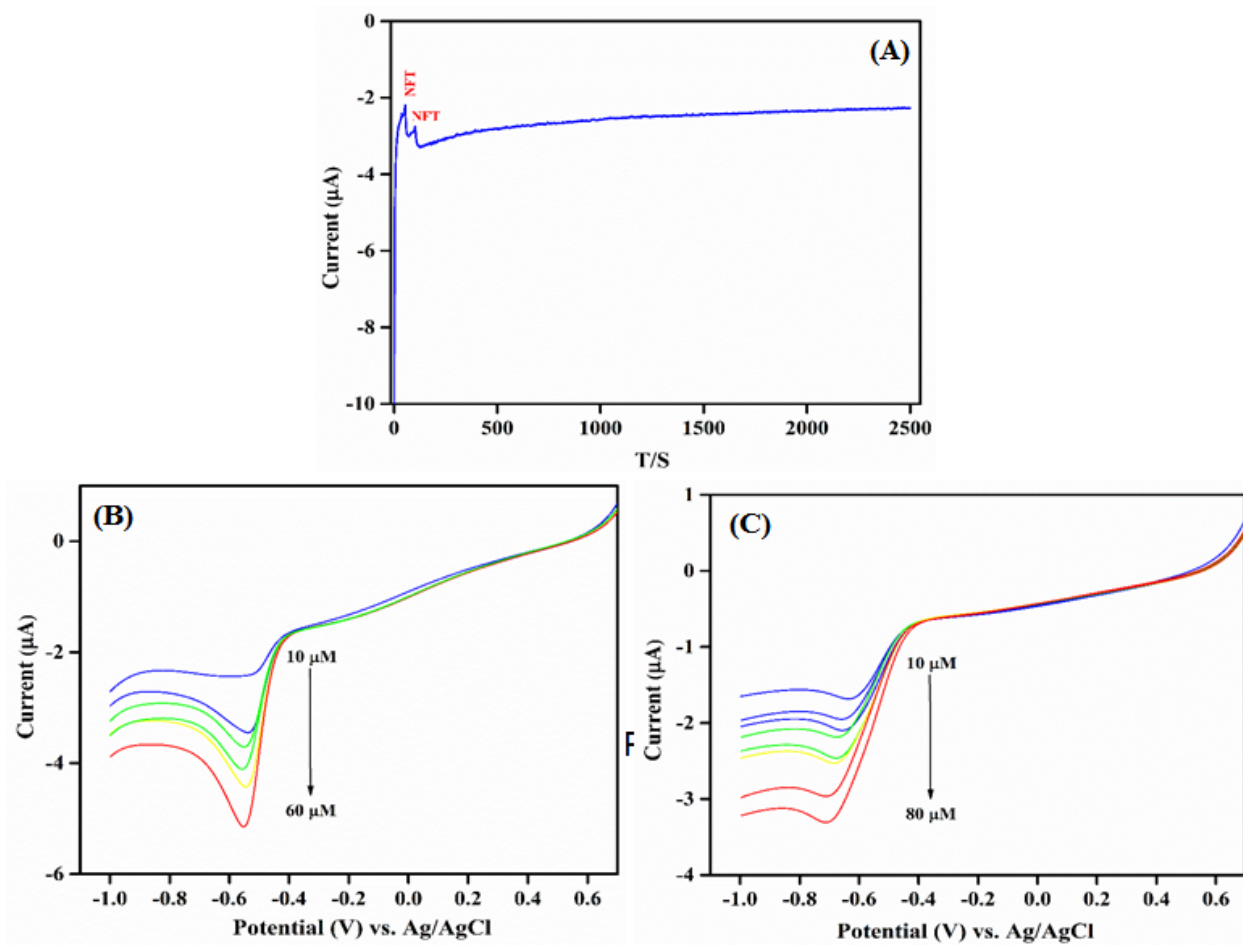

**Figure S4.** (A) Stability study response for 200  $\mu\text{L}$  of NFT in 0.1M PBS solution up to 2500S. (B) LSV response for the real sample NFT tablet concentration of 10-60  $\mu\text{M}$  and (C) NFT dissolved in tap water (10-80  $\mu\text{M}$ ).
